# Supplementary material for: Facile synthesis of boronic acid-functionalized magnetic carbon nanotubes for highly specific enrichment of glycopeptides
Source: Royal Society of Chemistry journal article supplement (doi:10.1039/c3nr05367a), 2013-12-03
Supplement: c3nr05367a.pdf [file c3nr05367a.pdf]

Electronic Supplementary Information (ESI) for Nanoscale

This journal is (c) The Royal Society of Chemistry 2013

## Facile synthesis of boronic acid-functionalized magnetic carbon nanotubes for highly specific enrichment of glycopeptides

Rongna Ma,<sup>a</sup> Junjie Hu,<sup>a</sup> Zongwei Cai<sup>b</sup> and Huangxian Ju\*<sup>a</sup>

<sup>a</sup> State Key Laboratory of Analytical Chemistry for Life Science, School of Chemistry and Chemical Engineering, Nanjing University, Nanjing 210093, P.R. China

<sup>b</sup> Department of Chemistry, Hong Kong Baptist University, Kowloon Tong, Kowloon, Hong Kong SAR, P.R. China

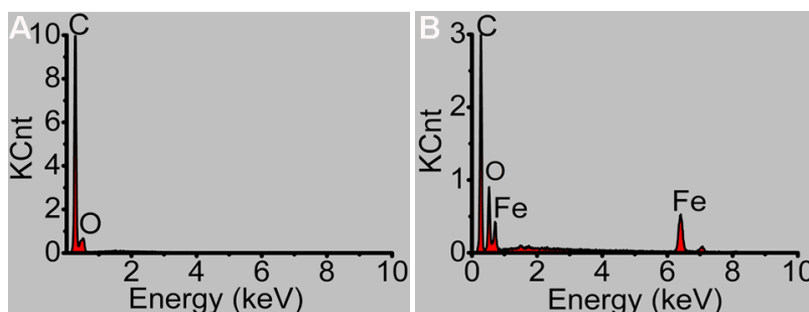

**Fig. S1** Energy-dispersive X-ray spectra of (A) CNTs and (B) MCNTs.

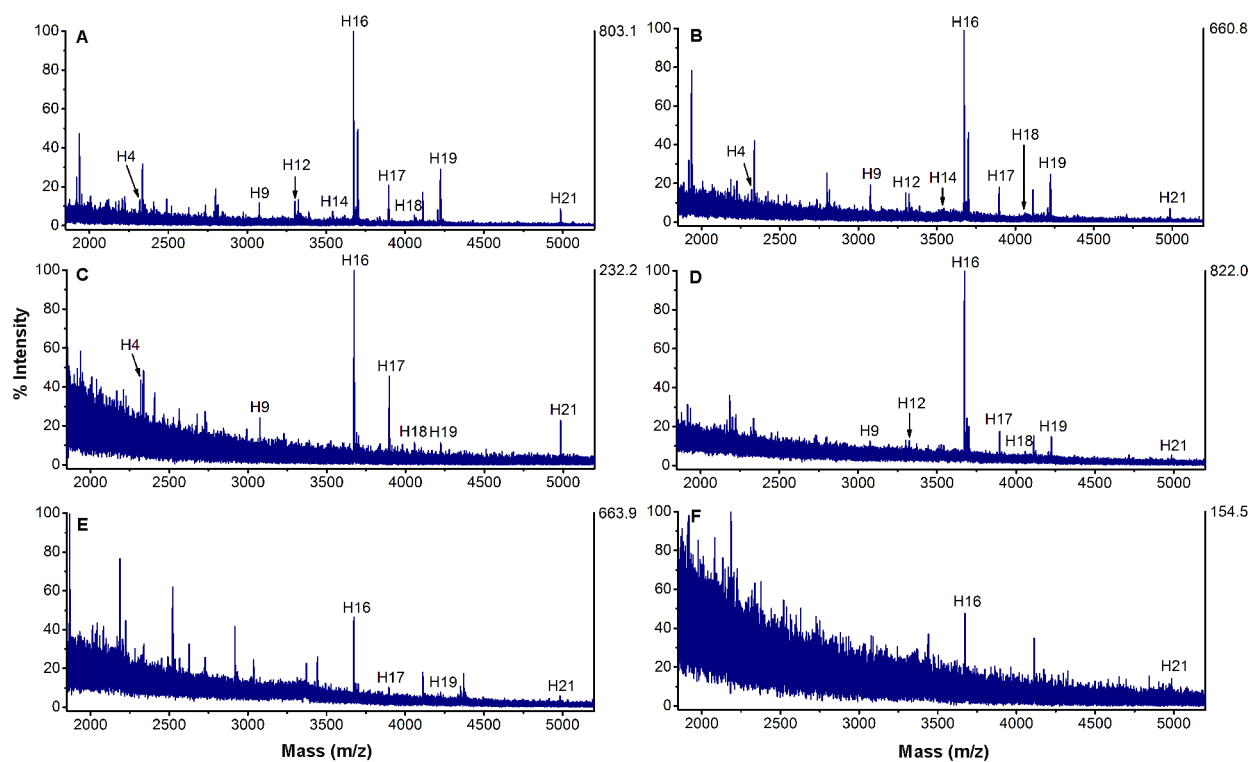

**Fig. S2** MALDI mass spectra of tryptic digest of (A) 10, (B) 5, (C) 2, (D) 1, (E) 0.2 and (F) 0.1  $\text{ng } \mu\text{L}^{-1}$  HRP after enrichment with commercial available APBA-agarose.

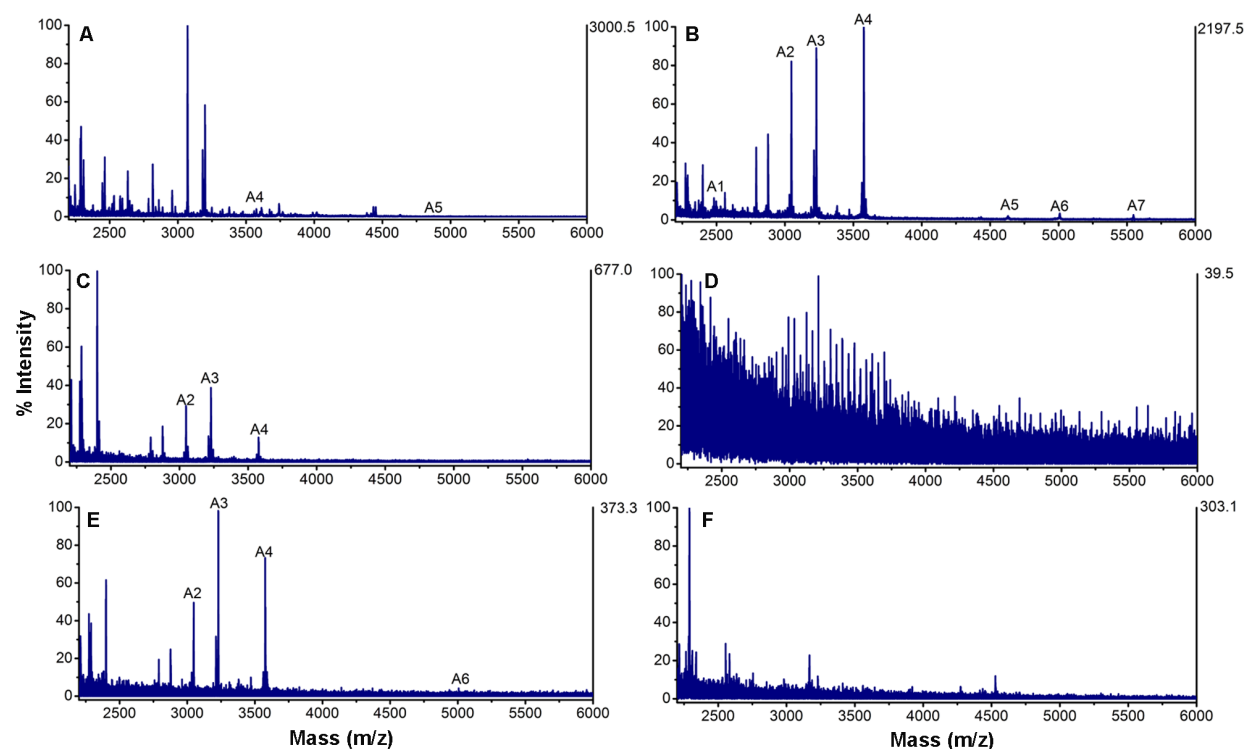

**Fig. S3** MALDI mass spectra of tryptic digests of 5.0 (A,B,C) and 0.5 (D,E,F)  $\text{ng } \mu\text{L}^{-1}$  AF without (A, D) and with enrichment by APBA-MCNTs (B, E) and commercial available APBA-agarose (C, F).

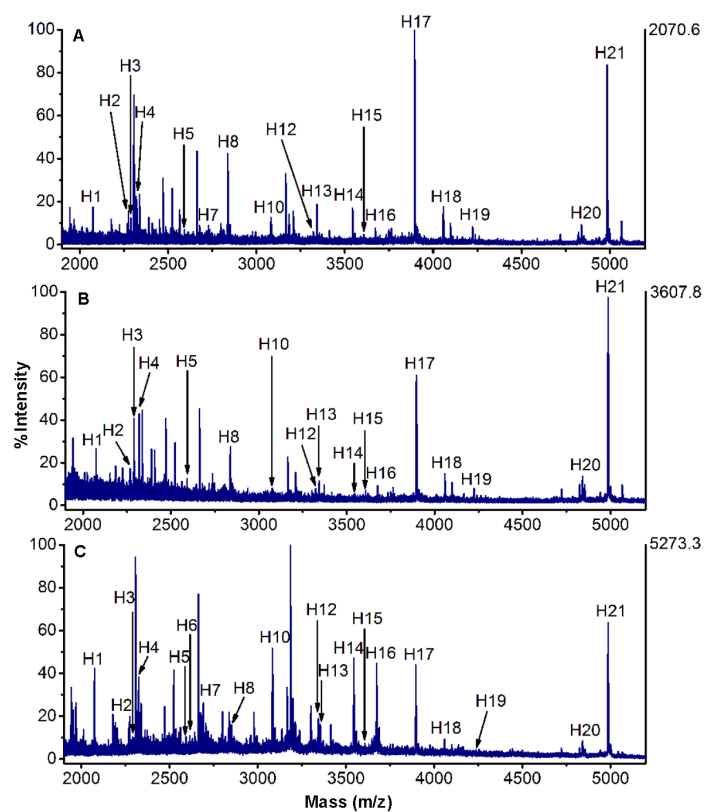

**Fig. S4** MALDI mass spectra of the mixtures of tryptic HRP and tryptic BSA at the mass ratios of (A) 1:5, (B) 1:10 and (C) 1:50 upon enrichment with APBA-MCNTs.

**Table S1. Detailed information of the glycopeptides enriched by APBA-MCNTs from HRP digest.**<sup>S1-S4</sup>

| No. | Observed m/z | Glycan composition                           | Amino acid sequence <sup>[a]</sup>                |
|-----|--------------|----------------------------------------------|---------------------------------------------------|
| H1  | 2068.9       | XylMan <sub>3</sub> FucGlcNAc <sub>2</sub>   | PN#VSNIVR                                         |
| H2  | 2276.2       | XylMan <sub>2</sub> FucGlcNAc <sub>2</sub>   | SILLDN#TTSFR                                      |
| H3  | 2290.1       | XylMan <sub>2</sub> GlcNAc <sub>2</sub>      | SILLDN#TTSFR                                      |
| H4  | 2321.2       | Man <sub>2</sub> GlcNAc <sub>2</sub>         | MGN#ITPLTGTQGQIR                                  |
| H5  | 2591.3       | XylMan <sub>3</sub> FucGlcNAc <sub>2</sub>   | PTLN#TTYLQTLR                                     |
| H6  | 2612.1       | XylMan <sub>3</sub> GlcNAc <sub>2</sub>      | MGN#ITPLTGTQGQIR                                  |
| H7  | 2704.3       | GlcNAc                                       | GLIQSDQELFSSPN#ATDTIPLVR                          |
| H8  | 2850.4       | FucGlcNAc                                    | GLIQSDQELFSSPN#ATDTIPLVR                          |
| H9  | 3074.3       | FucGlcNAc                                    | LHFHDCFVNGCDASILLDN#TTSFR                         |
| H10 | 3087.4       | XylMan <sub>3</sub> FucGlcNAc <sub>2</sub>   | GLCPLNGN#LSALVDFDLR                               |
| H11 | 3275.2       | Man <sub>3</sub> GlcNAc <sub>2</sub> FucXyl  | SC(AAVESACPR)PN#VSNIVR                            |
| H12 | 3323.4       | XylMan <sub>3</sub> FucGlcNAc <sub>2</sub>   | QLTPTFYDN SCPN#VSNIVR                             |
| H13 | 3353.3       | XylMan <sub>3</sub> FucGlcNAc <sub>2</sub>   | SFAN#STQTFNFVVEAMDR                               |
| H14 | 3525.6       | XylMan <sub>3</sub> GlcNAc <sub>2</sub>      | GLIQSDQELFSSPN#ATDTIPLVR                          |
| H15 | 3606.6       | XylMan <sub>3</sub> FucGlcNAc <sub>2</sub>   | NQCRGLCPLNGN#LSALVDFDLR                           |
| H16 | 3671.7       | XylMan <sub>3</sub> FucGlcNAc <sub>2</sub>   | GLIQSDQELFSSPN#ATDTIPLVR                          |
| H17 | 3894.6       | XylMan <sub>3</sub> FucGlcNAc <sub>2</sub>   | LHFHDCFVNGCDASILLDN#TTSFR                         |
| H18 | 4057.9       | XylMan <sub>3</sub> GlcNAc <sub>2</sub>      | QLTPTFYDN SC(AAVESACPR)PN#VSNIVR-H <sub>2</sub> O |
| H19 | 4223.2       | XylMan <sub>3</sub> FucGlcNAc <sub>2</sub>   | QLTPTFYDN SC(AAVESACPR)PN#VSNIVR                  |
| H20 | 4837.2       | XylMan <sub>3</sub> FucGlcNAc <sub>2</sub> , | LYN#FSNTGLPDPTLN#TTYLQTLR                         |
|     |              | XylMan <sub>3</sub> GlcNAc <sub>2</sub>      |                                                   |
| H21 | 4983.2       | XylMan <sub>3</sub> FucGlcNAc <sub>2</sub> , | LYN#FSNTGLPDPTLN#TTYLQTLR                         |
|     |              | XylMan <sub>3</sub> FucGlcNAc <sub>2</sub>   |                                                   |

<sup>[a]</sup> The *N*-glycosylation sites are marked with N#. GlcNAc = *N*-acetylglucosamine, Fuc = fucose, Man = mannose, Xyl = xylose.

**Table S2. Detailed information of the glycopeptides enriched by APBA-MCNTs from AF digest.**<sup>S2</sup>

| No. | Observed m/z | Glycan composition                                                        | Amino acid sequence <sup>[a]</sup>                    |
|-----|--------------|---------------------------------------------------------------------------|-------------------------------------------------------|
| A1  | 2494.9       |                                                                           | y-NH <sub>3</sub> ion (+1)<br>EVALATFNAESNGSYLQLVEISR |
| A2  | 3016.4       |                                                                           | VVHAVEVALATFNAESNGSYLQLVEISR                          |
| A3  | 3219.2       | GlcNAc                                                                    | VVHAVEVALATFNAESN#GSYLQLVEISR                         |
| A4  | 3576.7       | Man <sub>3</sub> GlcNAc <sub>2</sub>                                      | b ion (+1)<br>EVYDIEIDTLETCHVLDPTPLAN#C               |
| A5  | 4638.6       | Gal <sub>2</sub> GlcNAc <sub>2</sub> Man <sub>3</sub> GlcNAc <sub>2</sub> | VVHAVEVALATFNAESN#GSYLQLVEISR                         |
| A6  | 5005.1       | Gal <sub>3</sub> GlcNAc <sub>3</sub> Man <sub>3</sub> GlcNAc <sub>2</sub> | VVHAVEVALATFNAESN#GSYLQLVEISR                         |
| A7  | 5545.8       | Gal <sub>3</sub> GlcNAc <sub>3</sub> Man <sub>3</sub> GlcNAc <sub>2</sub> | RPTGEVYDIEIDTLETCHVLDPTPLAN#CSVR                      |

<sup>[a]</sup> The *N*-glycosylation sites are marked with N#. GlcNAc = *N*-acetylglucosamine, Man = mannose, Gal = galactose.

## References

- 1 Y. Y. Qu, J. X. Liu, K. G. Yang, Z. Liang, L. H. Zhang and Y. K. Zhang, *Chem. Eur. J.*, 2012, **18**, 9056.
- 2 L. J. Zhang, Y. W. Xu, H. L. Yao, L. Q. Xie, J. Yao, H. J. Lu and P. Y. Yang, *Chem. Eur. J.*, 2009, **15**, 10158.
- 3 Z. F. Zeng, Y. D. Wang, X. H. Guo, L. Wang and N. Lu, *Analyst*, 2013, **138**, 3032.
- 4 Z. C. Xiong, L. Zhao, F. J. Wang, J. Zhu, H. Q. Qin, R. A. Wu, W. B. Zhang and H. F. Zou, *Chem. Commun.*, 2012, **48**, 8138.
